# Supplementary material for: Bacteroides thetaiotaomicron uses a widespread extracellular DNase to promote bile-dependent biofilm formation
Source: PubMed Central journal article supplement — Proc Natl Acad Sci U S A. 2022 Feb 10;119(7):e2111228119. doi: 10.1073/pnas.2111228119 (PMC8851478; doi:10.1073/pnas.2111228119), 2022-02-10
Supplement: pnas.2111228119.sapp.pdf [file pnas.2111228119.sapp.pdf]

1 **SUPPORTING INFORMATION**

2 **This PDF file includes:**

3

4 Supporting Information Figures 1 to 13

5

6 Supporting Information Tables S1 to S4

7

8 Supporting Dataset S1 is uploaded separately as an excel spreadsheet)

9

10 Supporting Information reference list

11

12 **SUPPORTING FIGURES**

13

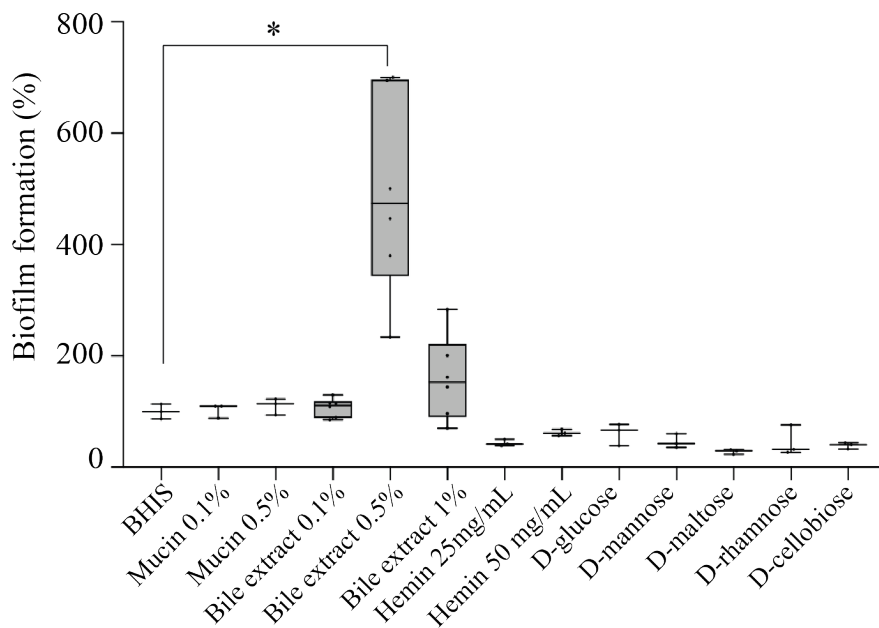

14

15 Supporting Figure S1. **Bile is the only tested environment cue that induces biofilm**  
16 **formation of *B. thetaiotaomicron* VPI-5482.** *B. thetaiotaomicron* VPI-5482 after 24h  
17 growth in BHIS supplemented with 0.5% D-glucose, D-mannose, D-rhamnose, D-  
18 cellobiose and D-maltose, 25 mg/L and 50 mg/L hemin, 0.1% and 0.5% mucin, and  
19 0.1%, 0.5%, 1% bovine-ovine bile extract. Min-max boxplot of 3-6 biological replicates  
20 for each strain. \* p-value<0.05, \*\* p-value<0.005, Mann-Whitney test.

21

1

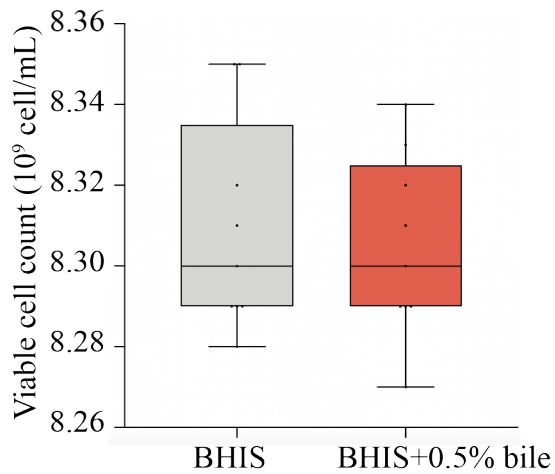

2

3 Supporting Figure S2. **0.5% bile extract concentration is non-toxic for *Bacteroides***  
4 ***thetaiotaomicron***. **A.** Flow cytometry of *B. thetaiotaomicron* VPI-5482 cultures grown  
5 in presence or absence of bile and dyed with propidium iodide to label live cells. The  
6 viable cell count is shown as a min-max boxplot of 6 biological replicates.

7

8

1

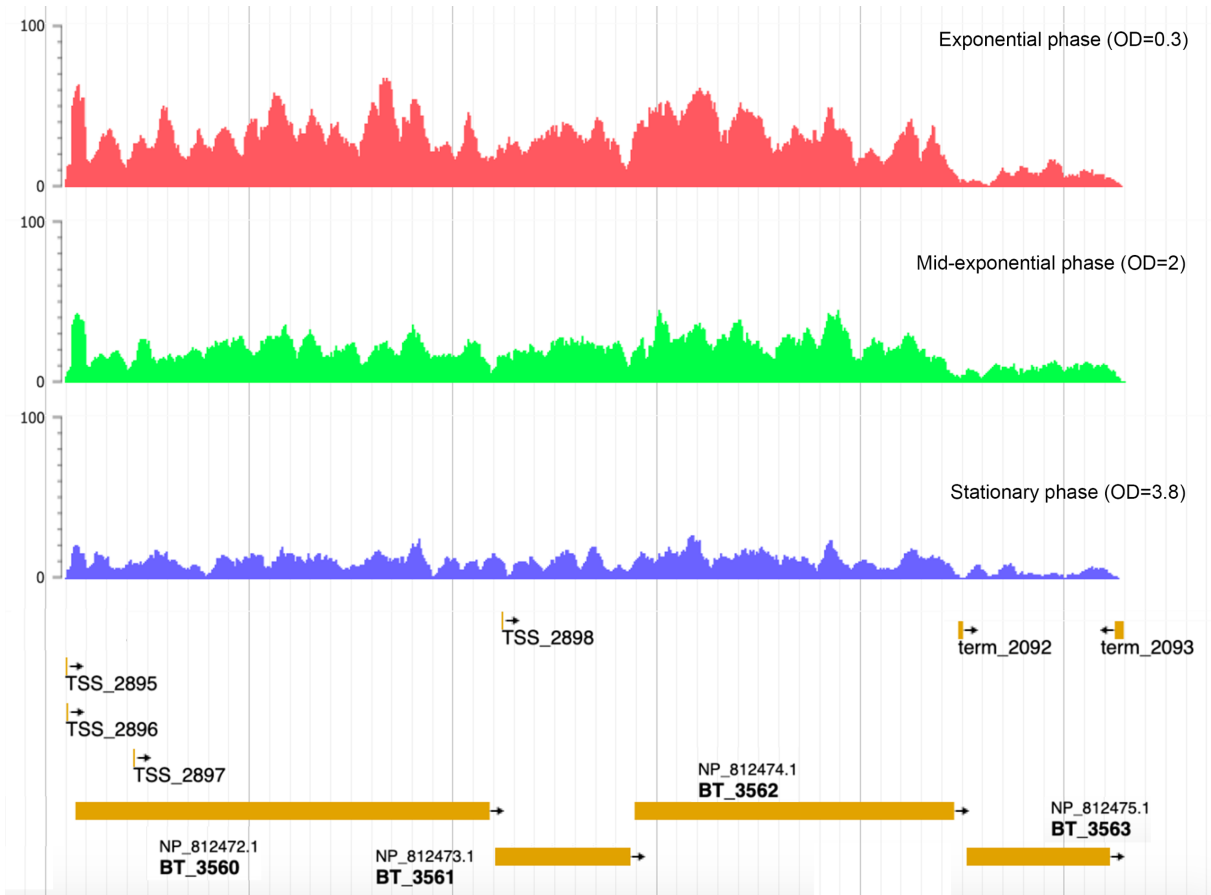

2  
3

4 Supporting Figure S3. **BT3560-BT3563 operon**. RNAseq reads from *B.*  
5 *thetaitaomicron* VPI-5482 grown in TYG medium to exponential phase (OD=0.3) in  
6 red, mid-exponential phase (OD=2) in green and stationary phase (OD=3.8) in blue  
7 are mapped to the *BT3560-BT3563* genetic locus. Predicted transcriptional start sites  
8 (TSS) and terminators (term) are depicted, showing the predicted operon structure of  
9 *BT3560-BT3563*. Data and bioinformatics prediction from Theta-Base database (1)  
10 (<https://bacteroides.helmholtz-hzi.de/>) plotted on JBrowse (2).

11  
12

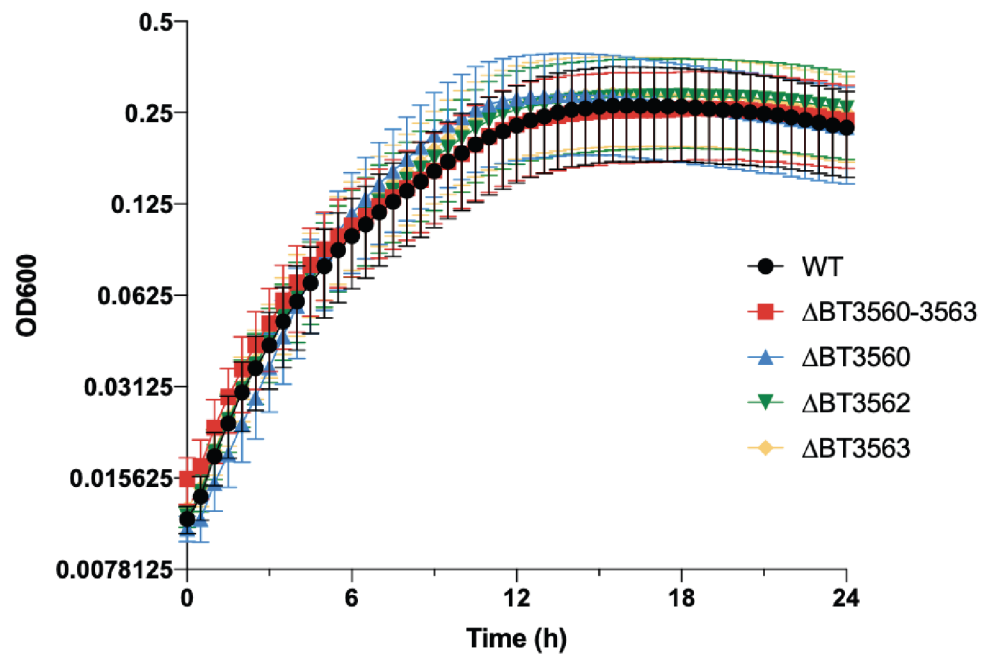

1  
 2 Supporting Figure S4. **Growth curve.** 24h growth curve of indicated strains in 96-well  
 3 plate in BHIS+0.5% bile extract. Mean of 6 biological replicates, error bars represent  
 4 standard error to the mean (SEM).  
 5

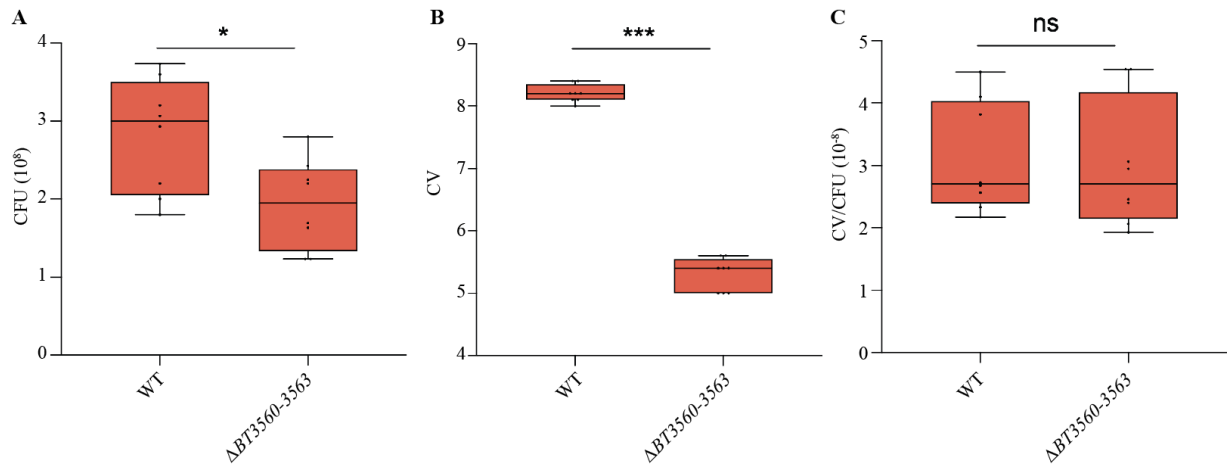

1  
2  
3  
4  
5  
6  
7  
8

Supporting Figure S5: **Quantification of cells in biofilm.** 96-well plate biofilm assay after 48h growth in BHIS+0.5% bile extract. Two plates were inoculated. One was used for **A.** resuspension of the biofilm and colony forming unit (CFU) count, the other was used for **B.** crystal violet (CV) staining. **C.** Ratio of CV over CFU count. Min-max boxplot of 8 biological replicates for each strain. \* p-value<0.05, \*\*\*p-value<0.0005, Mann-Whitney test.

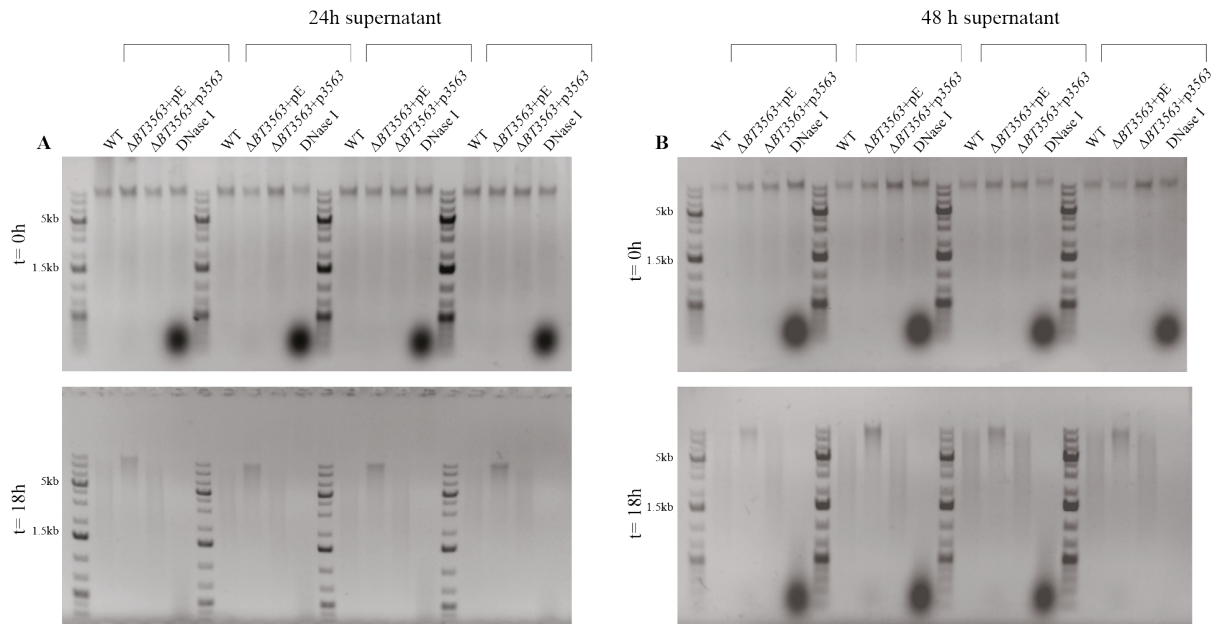

1  
 2 Supporting Figure S6. **BT3563 degrades DNA in culture supernatant.** Incubation of  
 3 *B. thtaiotaomicron* genomic DNA (23ng/μL final concentration) with the supernatant  
 4 of **A.** 24h and **B.** 48h bile-free cultures, as indicated, and loaded immediately on a 1 %  
 5 agarose gel (t=0h) and after an overnight incubation at 37°C (t=18h). A control using  
 6 DNase I rather than supernatant is shown in the last lane. pE: empty vector, p3563:  
 7 vector constitutively expressing BT3563. One replicate of **B.** is shown in Figure 3A.  
 8

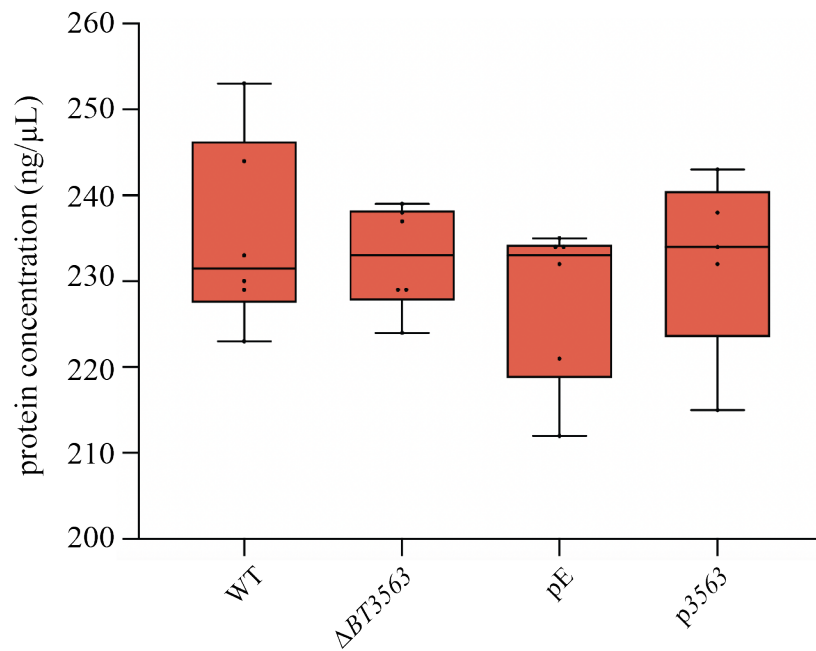

1

2 Supporting Figure S7. **BT3563 does not impact protein concentration in the**  
 3 **extracellular matrix.** Extracellular protein concentration (ng/ $\mu$ L) in the purified  
 4 extracellular matrix of bile-dependent biofilms grown in BHIS+0.5% bile extract for 48h.  
 5 Min-max boxplot of 6 biological replicates for each strain. \* p-value<0.05, \*\* p-  
 6 value<0.005, Mann-Whitney test.

7

1

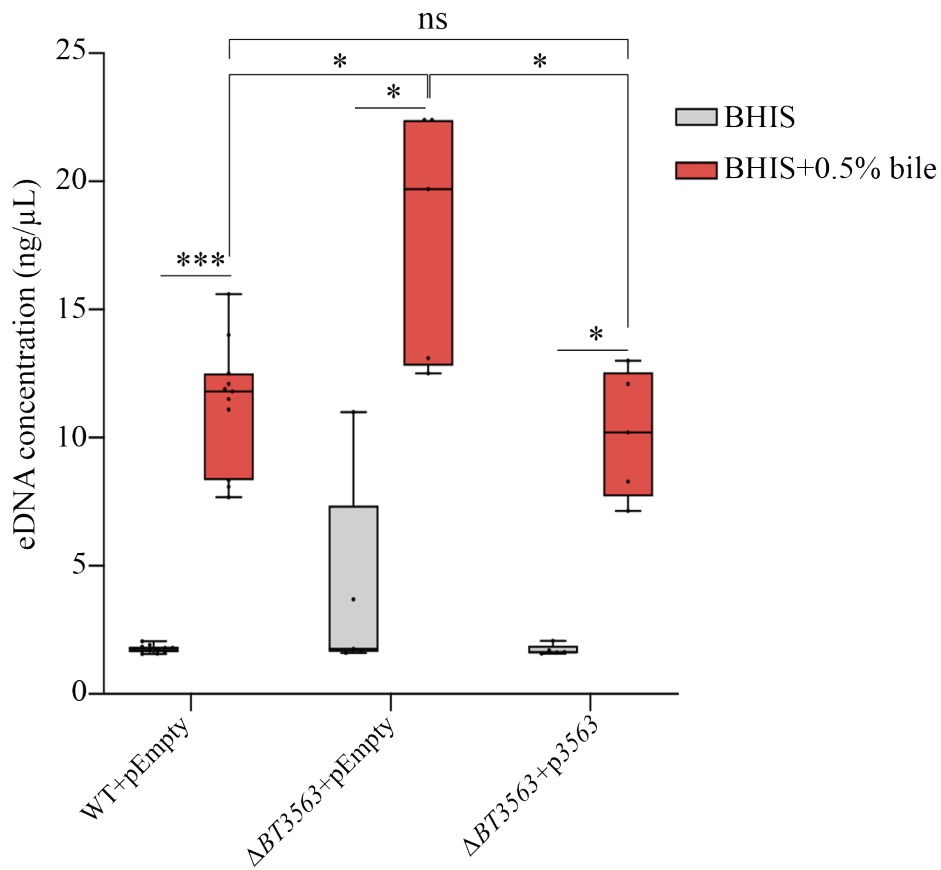

2

3 Supporting Figure S8. **Bile increases eDNA concentration in the supernatant.**

4 Extracellular DNA concentration (ng/μL) in the supernatant of overnight cultures of

5 indicated strains grown in BHIS or BHIS+0.5% bile extract. Min-max boxplot of 6-11

6 biological replicates for each strain. \* p-value<0.05, \*\*\* p-value<0.0005, Mann-Whitney

7 test.

8



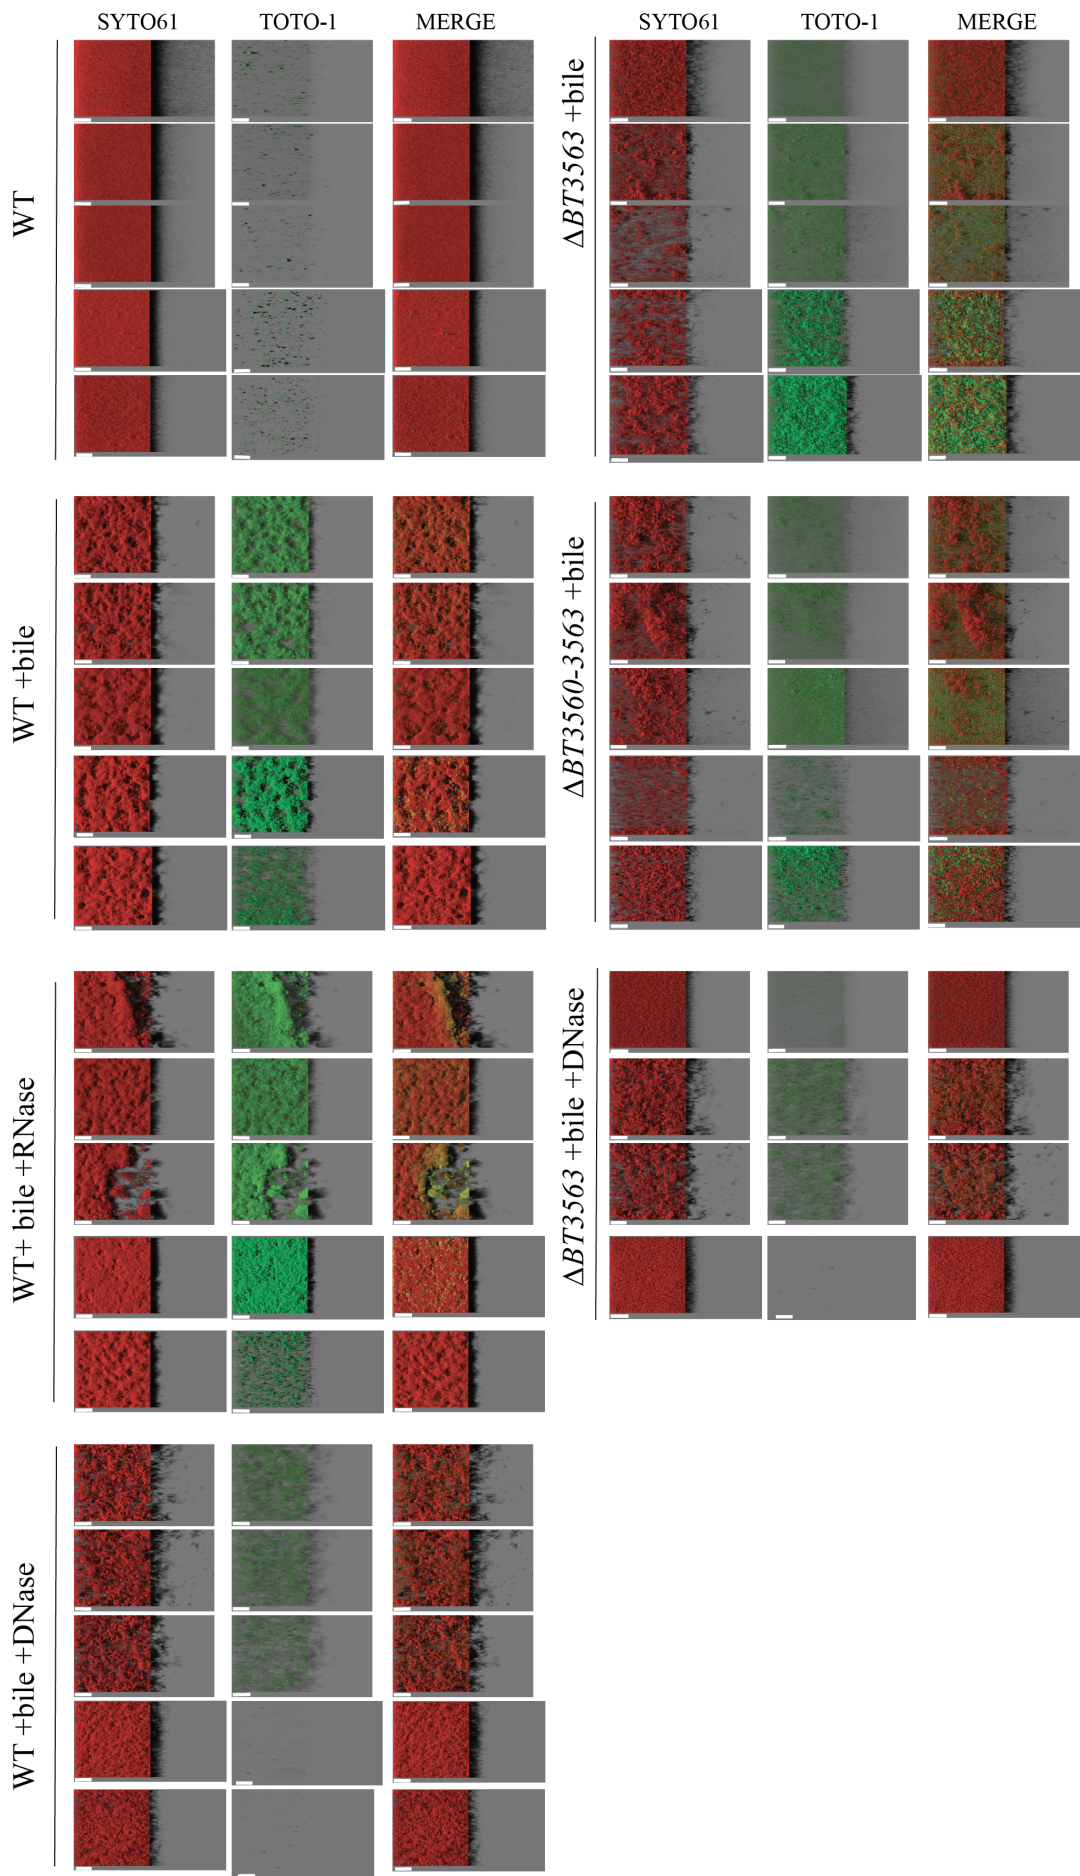

1 Supporting Figure S9. **Visualization of *B. thetaiotaomicron* biofilms.** IMARIS easy  
2 3D projections from confocal laser scanning (CLSM) microscopy images of *B.*  
3 *thetaiotaomicron* biofilms grown in plates in absence or presence of 0.5% bile extract  
4 (“+bile”), RNase I (“+RNase”), or DNase I (“+DNase”). Cells are labelled with SYTO61  
5 dye (left panel, in red). eDNA and dead cells are labelled with TOTO-1 (middle panel,  
6 in green). The merged image is shown on the right. For each image, the virtual shadow  
7 projection of the biofilm is shown on the right. Scale bars represent 40 µm.  
8

WT

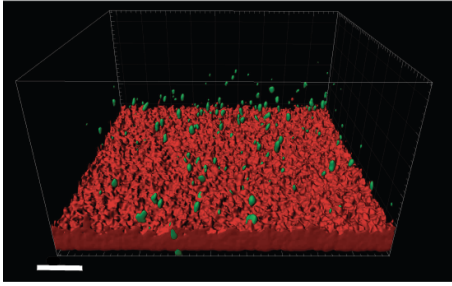

WT +bile

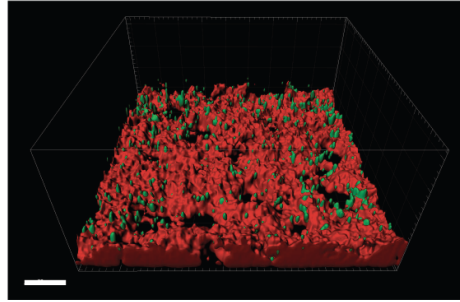

WT+ bile +RNase

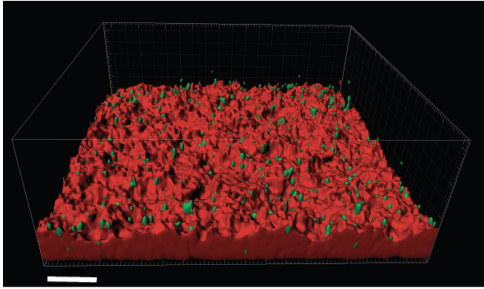

WT +bile +DNase

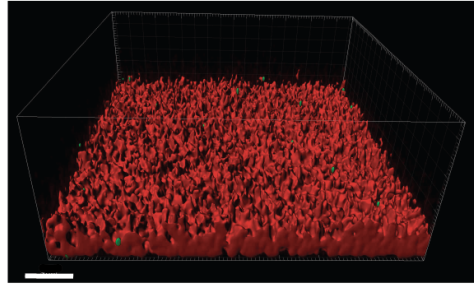

$\Delta BT3563$  +bile

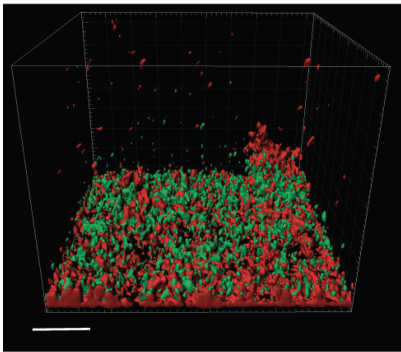

$\Delta BT3560-3563$  +bile

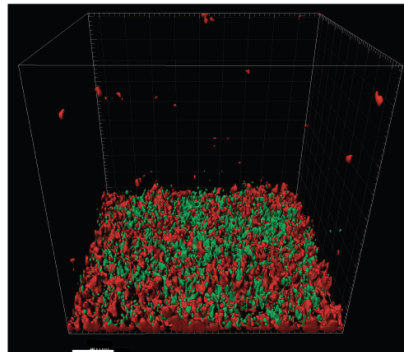

$\Delta BT3563$  +bile +DNase

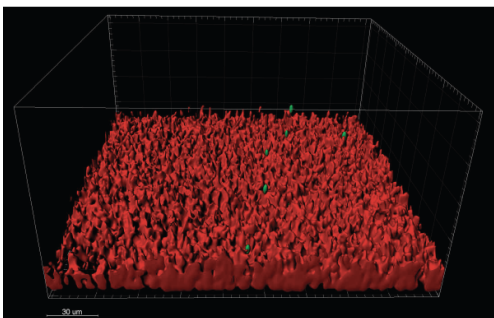

1  
2  
3  
4  
5  
6  
7  
8

Supporting Figure S10. **3D reconstruction of *B. thetaiotaomicron* biofilms.** 3D reconstruction of *B. thetaiotaomicron* biofilm grown in plates in absence or presence of 0.5% bile extract (“+bile”), RNase I (“+RNase”), or DNase I (“+DNase”). Merged images showing cells labelled with SYTO61 dye in red and extracellular DNA and dead cells labelled with TOTO-1 in green. Scale bar represent 30  $\mu$ m.

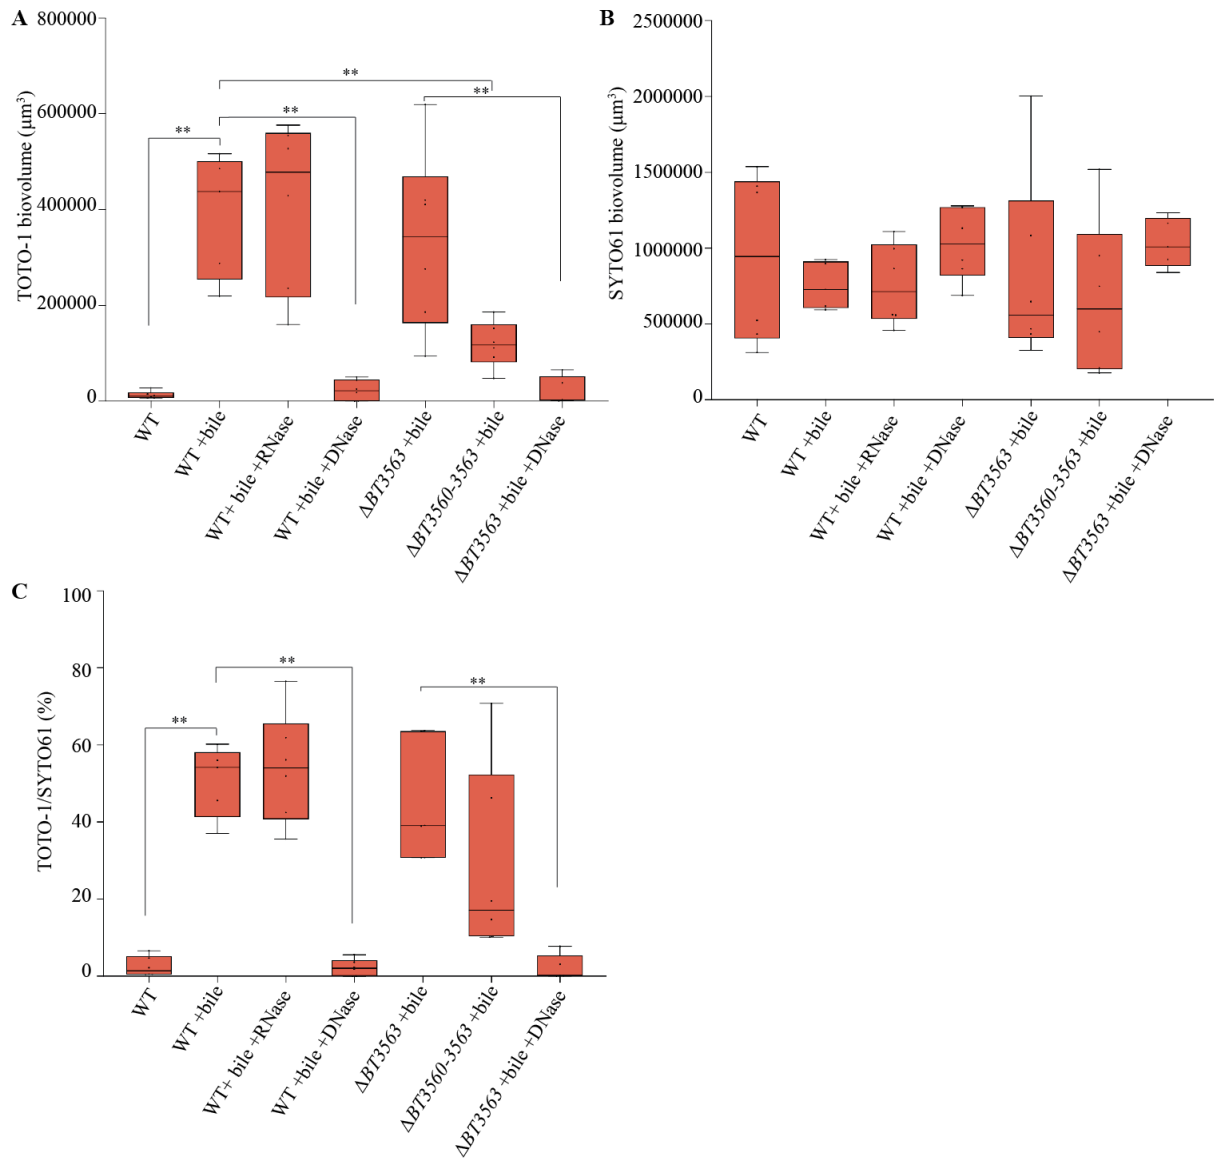

1  
 2 Supporting Figure S11. **Quantification of confocal microscopy images.** Min-Max  
 3 boxplot of **A.** biovolumes of TOTO-1 ( $\mu\text{m}^3$ ) and **B.** SYTO61 fluorescence ( $\mu\text{m}^3$ ) and **C.**  
 4 TOTO-1/SYTO61 fluorescence ratio (%). 5-6 biological replicates, each representing  
 5 the mean of 2-3 technical replicates. \*\* p-value<0.005, Mann-Whitney test.

6

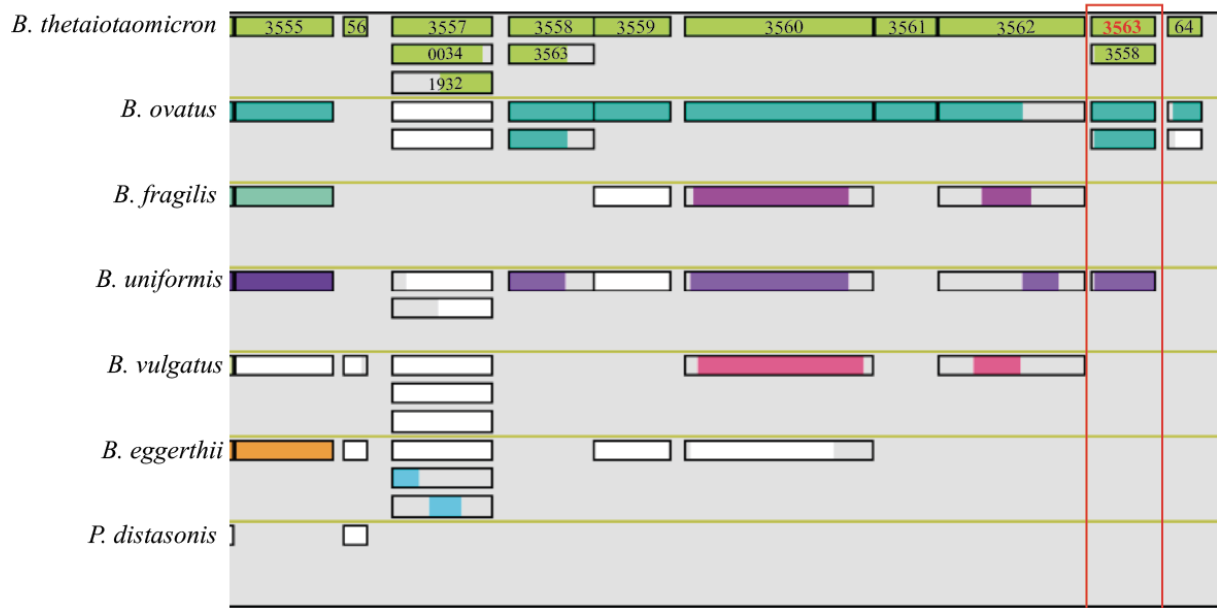

1  
2 Supporting Figure S12. **BT3555-3564 synteny among the tested Bacteroidales.**  
3 Synteny analysis was performed using the Genome browser tool of the genome  
4 analysis platform MicroScope,  
5 (<https://mage.genoscope.cns.fr/microscope/mage/viewer.php?>) (3) For each genome,  
6 the first line represents the genes on the chromosome, and the additional lines  
7 represent homologs of the considered gene within the same genome, when applicable.  
8 The colored bar represents the length of the homology. Locus tags are indicated for *B.*  
9 *thetaitaomicron* VPI-5482 strain, and the homologs of *BT3563* are indicated in a red  
10 square.

11  
12  
13

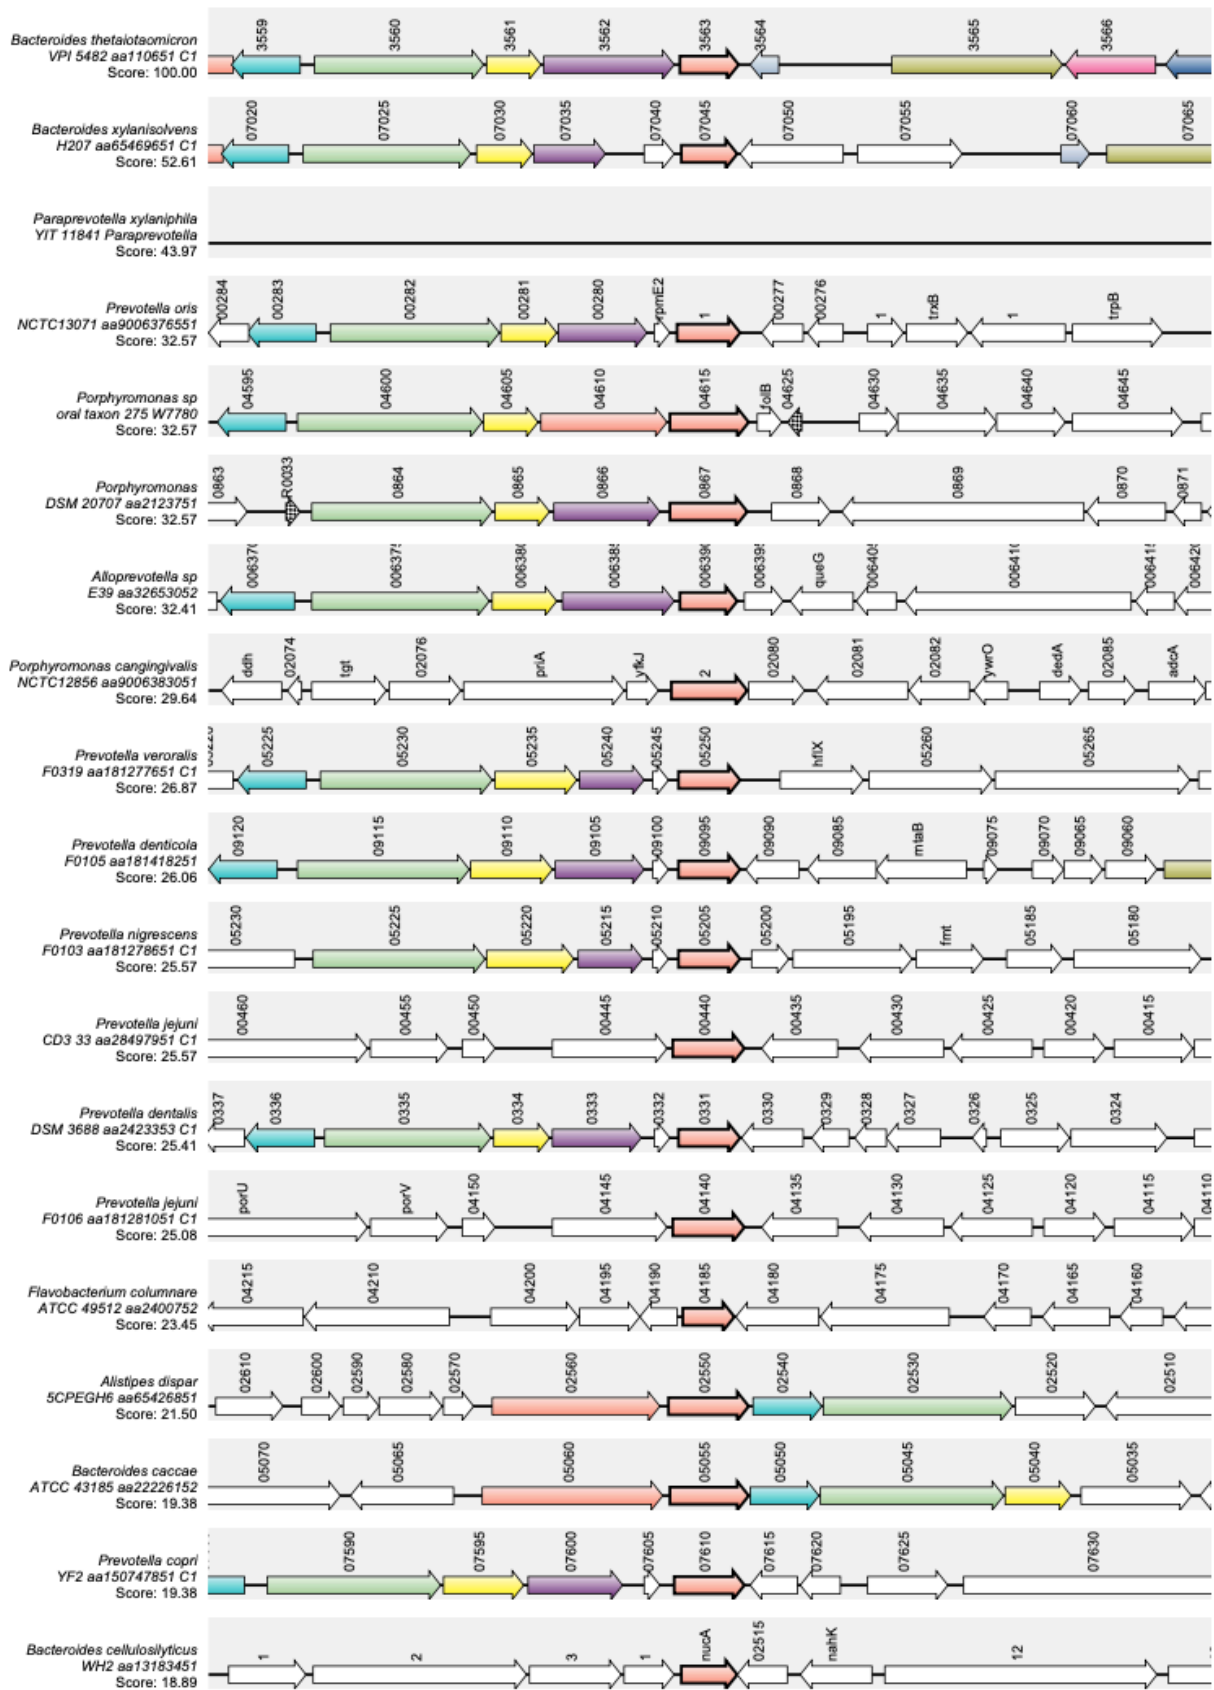

1  
2

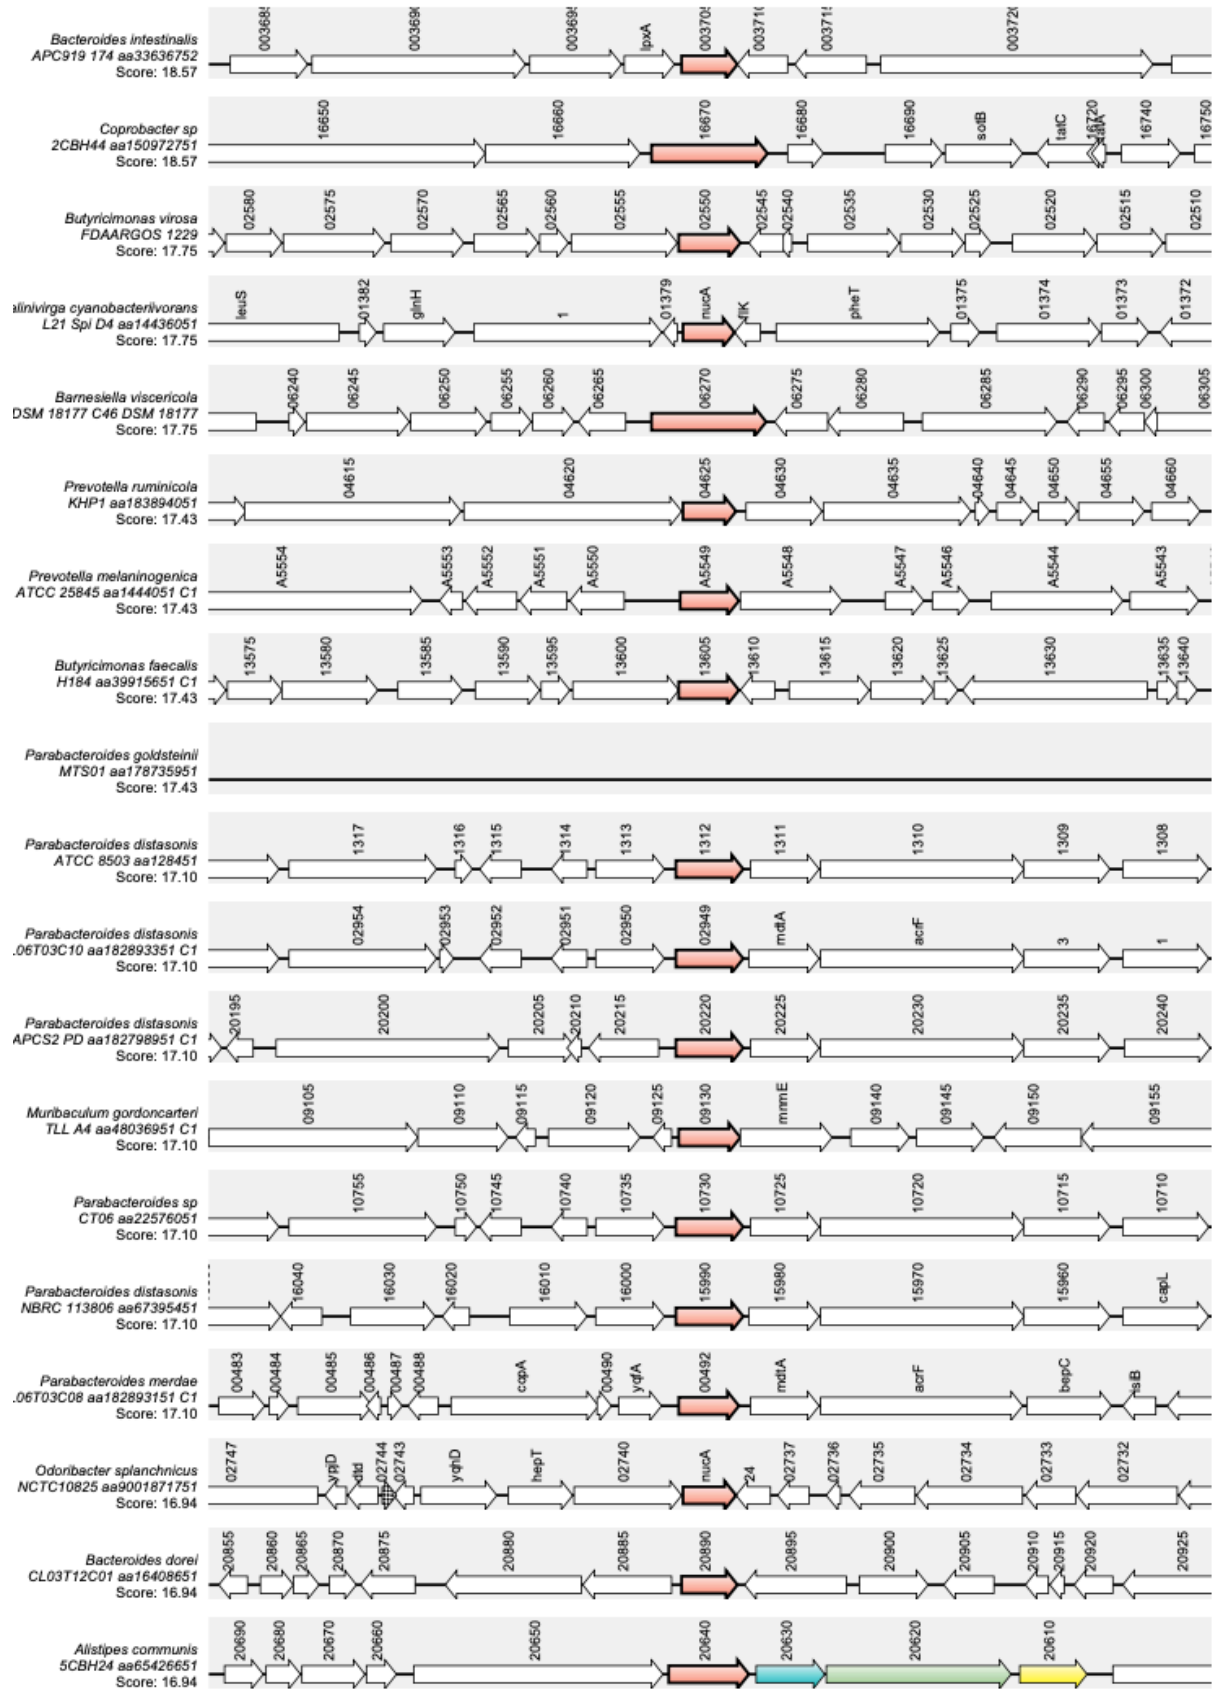

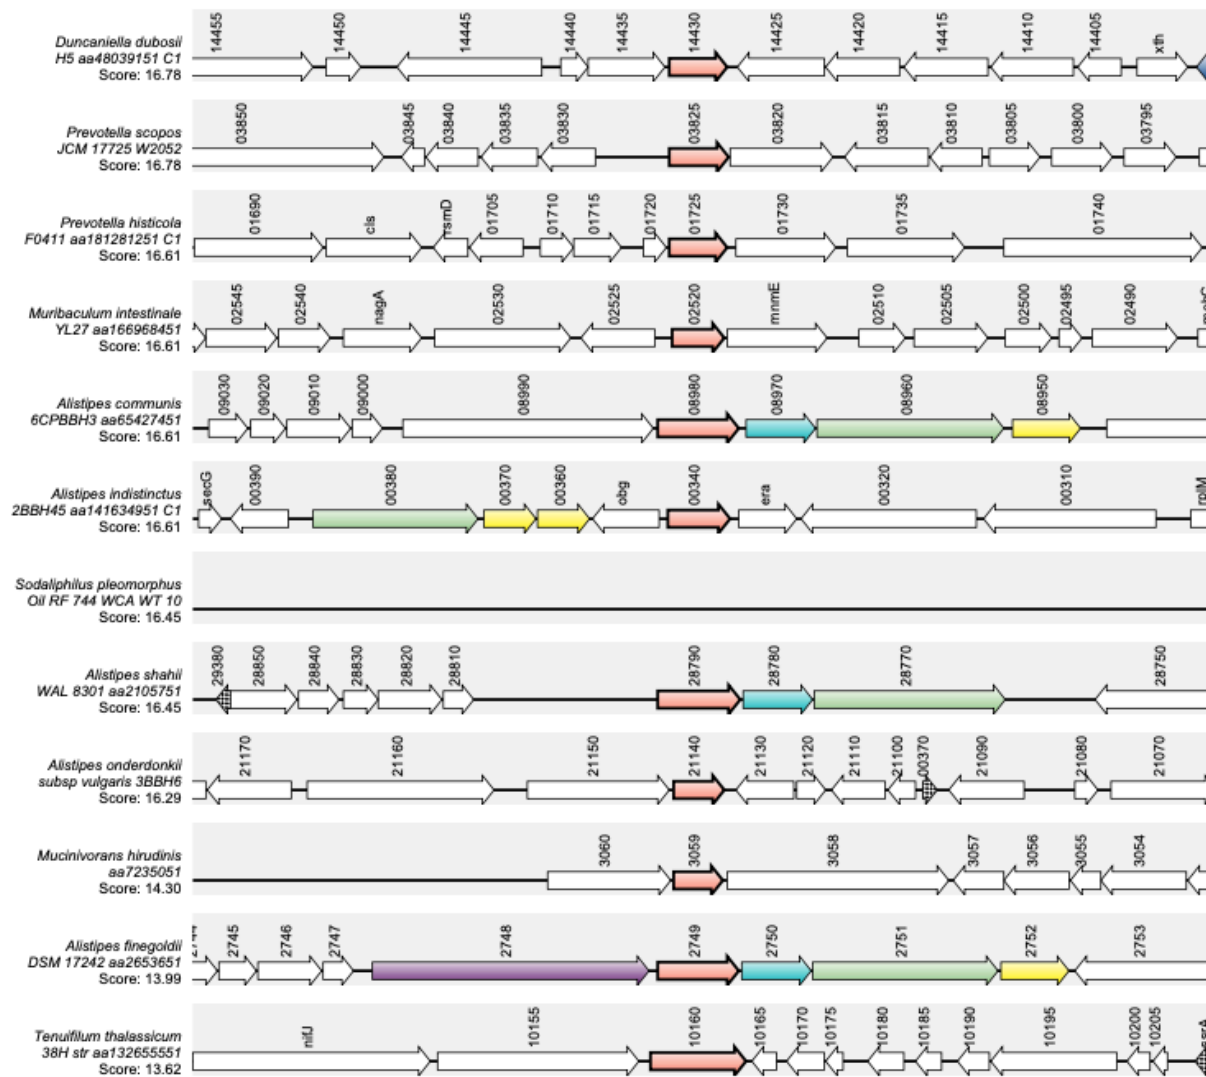

1  
2

### Query protein sequence:

```

mrfnfrsvlllicctfflvscskddedenkeniafspielpalrngaddiflspstttfngqqvitysmey
dkskharwvafkyynvtgqtnwrrndwkqtewggdpwqsdpnipqadqrvsdfgkqgydrghicassd
rlyskdanegtffyymspnknyfngtkgiwndlegkvrtrwrsstfrdtlyvvkqgtdikenqwtiyg
gdkskpvkpyfmallckkgetykaigfwdqstvtvkpalsecaktideleeltgldffhnlpdnlenav
eskyaisawtqlq*

```

### Genomes without synteny:

```

Dysgonomonas_sp_HDW5A_aa112995551
Proteiniphilum_saccharofermentans_M3_6_aa9000951351
Paludibacter_propionicigenes_WB4_aa1831351
Fermentimonas_caenicola_aa9535351
Petrimonas_mucosa_ING2_E5A_aa9000957951
Petrimonas_sp_IBARAKI_aa23564352
Porphyromonas_gingivalis_381_aa13142651
Porphyromonas_gingivalis_ATCC_33277_aa105051
Porphyromonas_gingivalis_KCOM_2796_aa27541151
Porphyromonas_gingivalis_LyG_2_aa181417451
Prevotella_denticola_KCOM_1525_aa35150451_C1
Prevotella_intermedia_ATCC_25611_DSM_20706_aa19539551_C1
Prevotella_multiformis_F0096_aa181279851_C1
Tannerella_forsythia_3313_aa15478751
Tannerella_sp_oral_taxon_HOT_286_W11666_aa30339251
Labilibaculum_antarcticum_SPP2_aa23562951
Alkalitalea_saponilacus_SC_BZ_SP2_aa22017951
Draconibacterium_orientale_FH5_aa6266351
Draconibacterium_sp_M1_aa104488351
Chryseobacterium_gallinarum_DSM_27622_aa10219751
Chryseobacterium_indoltheticum_ATCC_27950_aa38159151
Chryseobacterium_joostei_DSM_16927_aa38157751_C1
Chryseobacterium_indologenes_DSM_16777_aa160250551

```

3

4



1 Supporting Figure S13. **BT3563 synteny among diverse Bacteroidetes**. Synteny  
2 analysis was performed using the web tool SyntTax (4). Homologs of the gene of  
3 interest, *BT3563*, are marked in bold. Homologous genes are represented in the same  
4 color. Locus tags are annotated on top of each gene. A list of all tested strains for which  
5 no *BT3563* homologs was found is present at the bottom.

6

7

1 **SUPPORTING TABLES**

2

3 **Supporting Table S1. *Bacteroides thetaiotaomicron* strains used in this study**

| Strain | Strain name 2 | Origin                                           | From        | PATRIC ID | Genbank ID           |
|--------|---------------|--------------------------------------------------|-------------|-----------|----------------------|
| jmh42  | N03576        | Perforated ulcer                                 | CHU Limoges | 818.1412  | JAGURM000000000<br>0 |
| jmh43  | N03525        | Blood                                            | CHU Limoges | 818.1456  | JAGURL000000000      |
| jmh44  | N03594        | Blood                                            | CHU Limoges | 818.1484  | JAGWEU000000000<br>0 |
| jmh47  | N03736        | Hepatic abscess                                  | CHU Limoges | 818.1421  | JAGURK000000000      |
| jmh50  | Ana-1-p17     | Ascitic fluid                                    | CHU Limoges | 818.1481  | JAGWET000000000      |
| jmh51  | Ana2-p19      | Blood                                            | CHU Limoges | 818.1411  | JAGURJ000000000      |
| jmh58  | Ana4-p37      | Blood                                            | CHU Limoges | 818.1450  | JAGURI000000000      |
| jmh60  | os16-p16      | Hip implant                                      | CHU Limoges | 818.1415  | JAGURH000000000      |
| jmh61  | Ana4-p81      | Continuous ambulatory peritoneal dialysis (CAPD) | CHU Limoges | 818.1480  | JAGWES000000000<br>0 |
| jmh62  | 10018         | Peritoneal fluid                                 | CHU Lille   | 818.1419  | JAGURG000000000      |
| jmh63  | 10023         | Blood                                            | CHU Lille   | 818.1414  | JAGURF000000000      |
| jmh66  | 10254         | Maxilar pus                                      | CHU Lille   | 818.1416  | JAGURE000000000      |
| jmh68  | 10263         | Blood                                            | CHU Lille   | 818.1451  | JAGURD000000000      |
| jmh71  | 11276         | Blood                                            | CHU Lille   | 818.1482  | JAGWER000000000<br>0 |
| jmh72  | 11278         | Anal abscess                                     | CHU Lille   | 818.1449  | JAGURC000000000      |
| jmh76  | 11285         | Fat tissue                                       | CHU Lille   | 818.1483  | JAGYXC000000000      |
| jmh78  | 12309         | Abdominal abscess                                | CHU Lille   | 818.1417  | JAGURB000000000      |
| jmh79  | 11314         | Intestinal cyste                                 | CHU Lille   | 818.1447  | JAGURA000000000      |

4

5

1 **Supporting Table S2. BT3563 homologs identified by blastp**

| Genome   | PATRIC ID                        | Length (AA) | ALN Length | Identity | Query cover | Subject cover | Hit from | Hit to | Score | E value   |
|----------|----------------------------------|-------------|------------|----------|-------------|---------------|----------|--------|-------|-----------|
| VPI-5482 | fig 226186.12.peg.3626 (BT_3563) | 293         | 293        | 100      | 100         | 100           | 1        | 293    | 614   | 0         |
| jmh42    | fig 818.1412.peg.329             | 296         | 296        | 87       | 99          | 99            | 4        | 296    | 532   | 0         |
| jmh43    | fig 818.1456.peg.161             | 396         | 396        | 34       | 81          | 60            | 149      | 385    | 119   | 8,00E-30  |
| jmh44    | fig 818.1484.peg.456             | 290         | 290        | 87       | 99          | 100           | 1        | 290    | 525   | 0         |
| jmh47    | fig 818.1421.peg.2384            | 290         | 290        | 87       | 99          | 100           | 1        | 290    | 525   | 0         |
| jmh50    | fig 818.1481.peg.2033            | 290         | 290        | 87       | 99          | 100           | 1        | 290    | 525   | 0         |
| jmh51    | fig 818.1411.peg.850             | 296         | 296        | 87       | 99          | 99            | 4        | 296    | 532   | 0         |
| jmh58    | fig 818.1450.peg.2100            | 223         | 223        | 97       | 77          | 100           | 1        | 223    | 457   | 1,00E-162 |
| jmh60    | fig 818.1415.peg.1161            | 399         | 399        | 34       | 81          | 59            | 152      | 388    | 119   | 1,00E-29  |
| jmh61    | fig 818.1480.peg.1186            | 291         | 291        | 87       | 100         | 100           | 1        | 291    | 527   | 0         |
| jmh62    | fig 818.1419.peg.360             | 399         | 399        | 34       | 81          | 59            | 152      | 388    | 119   | 9,00E-30  |
| jmh63    | fig 818.1414.peg.2874            | 396         | 396        | 34       | 81          | 60            | 149      | 385    | 119   | 9,00E-30  |
| jmh66    | fig 818.1416.peg.3454            | 291         | 291        | 87       | 100         | 100           | 1        | 291    | 527   | 0         |
| jmh68    | fig 818.1451.peg.696             | 399         | 399        | 34       | 81          | 59            | 152      | 388    | 119   | 1,00E-29  |
| jmh71    | fig 818.1482.peg.3309            | 399         | 399        | 34       | 81          | 59            | 152      | 388    | 119   | 1,00E-29  |
| jmh72    | fig 818.1449.peg.2960            | 396         | 396        | 34       | 81          | 60            | 149      | 385    | 119   | 8,00E-30  |
| jmh76    | fig 818.1483.peg.3838            | 296         | 296        | 85       | 93          | 92            | 26       | 296    | 478   | 1,00E-169 |
| jmh78    | fig 818.1417.peg.1663            | 293         | 293        | 100      | 100         | 100           | 1        | 293    | 613   | 0         |
| jmh79    | fig 818.1447.peg.3310            | 293         | 293        | 100      | 100         | 100           | 1        | 293    | 613   | 0         |

2  
3  
4

1 **Supporting Table S3.** Bacterial strains and plasmids used in this study

| Name in this paper                         | Genotype                                                          | Reference  |
|--------------------------------------------|-------------------------------------------------------------------|------------|
| <b><i>Bacteroides thetaiotaomicron</i></b> |                                                                   |            |
| WT/VPI-5482                                | VPI-5482 <i>_Δtdk</i>                                             | (5)        |
| jmh42                                      |                                                                   | (6)        |
| jmh43                                      |                                                                   | (6)        |
| jmh44                                      |                                                                   | (6)        |
| jmh47                                      |                                                                   | (6)        |
| jmh50                                      |                                                                   | (6)        |
| jmh51                                      |                                                                   | (6)        |
| jmh58                                      |                                                                   | (6)        |
| jmh60                                      |                                                                   | (6)        |
| jmh61                                      |                                                                   | (6)        |
| jmh62                                      |                                                                   | (6)        |
| jmh63                                      |                                                                   | (6)        |
| jmh66                                      |                                                                   | (6)        |
| jmh68                                      |                                                                   | (6)        |
| jmh71                                      |                                                                   | (6)        |
| jmh72                                      |                                                                   | (6)        |
| jmh76                                      |                                                                   | (6)        |
| jmh78                                      |                                                                   | (6)        |
| jmh79                                      |                                                                   | (6)        |
| 3H6                                        | VPI 5482 <i>_Δtdk</i> - BT3560:: <i>Tn</i>                        | This study |
| 26H1                                       | VPI 5482 <i>_Δtdk</i> - BT3562:: <i>Tn</i>                        | This study |
| 37G8                                       | VPI 5482 <i>_Δtdk</i> - BT3560:: <i>Tn</i>                        | This study |
| 46A4                                       | VPI 5482 <i>_Δtdk</i> - BT3560:: <i>Tn</i>                        | This study |
| 54A8                                       | VPI 5482 <i>_Δtdk</i> - BT3560:: <i>Tn</i>                        | This study |
| 55B7                                       | VPI 5482 <i>_Δtdk</i> - BT3560:: <i>Tn</i>                        | This study |
| 59E7                                       | VPI 5482 <i>_Δtdk</i> - BT3560:: <i>Tn</i>                        | This study |
| 62C12                                      | VPI 5482 <i>_Δtdk</i> - BT3562:: <i>Tn</i>                        | This study |
| 68H1                                       | VPI 5482 <i>_Δtdk</i> - BT3560:: <i>Tn</i>                        | This study |
| <i>ΔBT3560-3563</i>                        | VPI 5482 <i>_Δtdk_ΔBT3560-3563</i>                                | This study |
| <i>ΔBT3560</i>                             | VPI 5482 <i>_Δtdk_ΔBT3560</i>                                     | This study |
| <i>ΔBT3561</i>                             | VPI 5482 <i>_Δtdk_ΔBT3561</i>                                     | This study |
| <i>ΔBT3562</i>                             | VPI 5482 <i>_Δtdk_ΔBT3562</i>                                     | This study |
| <i>ΔBT3563</i>                             | VPI 5482 <i>_Δtdk_ΔBT3563</i>                                     | This study |
| WT+pEmpty                                  | VPI 5482 <i>_Δtdk</i> + pNBU2-bla-ery-p1311                       | This study |
| <i>ΔBT3560</i> +pEmpty                     | VPI 5482 <i>_Δtdk_ΔBT3560</i> + pNBU2-bla-erm-p1311               | This study |
| <i>ΔBT3560</i> +p3560                      | VPI 5482 <i>_Δtdk_ΔBT3560</i> + pNBU2-bla-erm-p1311 <i>BT3560</i> | This study |

|                                                    |                                                                           |                              |
|----------------------------------------------------|---------------------------------------------------------------------------|------------------------------|
| $\Delta$ BT3562+pEmpty                             | VPI 5482 $\Delta$ tdk $\Delta$ BT3562 + pNBU2-bla-erm-p1311               | This study                   |
| $\Delta$ BT3562+p3562                              | VPI 5482 $\Delta$ tdk $\Delta$ BT3560 + pNBU2-bla-erm-p1311 <i>BT3562</i> | This study                   |
| $\Delta$ BT3563+pEmpty                             | VPI 5482 $\Delta$ tdk $\Delta$ BT3563 + pNBU2-bla-tet-p1311               | This study                   |
| $\Delta$ BT3563+p3563                              | VPI 5482 $\Delta$ tdk $\Delta$ BT3560 + pNBU2-bla-tet-p1311 <i>BT3563</i> | This study                   |
| $\Delta$ BT3560-3563+pEmpty                        | VPI 5482 $\Delta$ tdk $\Delta$ BT3560-3563 + pNBU2-bla-tet-p1311          | This study                   |
| $\Delta$ BT3560-3563+p3563                         | VPI 5482 $\Delta$ tdk $\Delta$ BT3560 + pNBU2-bla-tet-p1311 <i>BT3563</i> | This study                   |
| jmh61 $\Delta$ 3563                                | jmh61_ $\Delta$ 3563 homolog                                              | This study                   |
| jmh43 $\Delta$ 3563                                | jmh43_ $\Delta$ 3563 homolog                                              | This study                   |
| <b>Bacteroidales</b>                               |                                                                           |                              |
| <i>Bacteroides fragilis</i> 638R                   |                                                                           | From Laurie Comstock         |
| <i>Bacteroides ovatus</i> CIP 103756T/ATCC 8483    |                                                                           | Institut Pasteur, collection |
| <i>Bacteroides eggerthii</i> CIP 104285T/DSM 20697 |                                                                           | Institut Pasteur, collection |
| <i>Bacteroides vulgatus</i> CIP 103714T/ATCC 8482  |                                                                           | Institut Pasteur, collection |
| <i>Bacteroides uniformis</i> CIP 103695T/ DSM 6597 |                                                                           | Institut Pasteur, collection |
| <i>Parabacteroides distasonis</i> ATCC 8503        |                                                                           | From Laurie Comstock         |
| <b>Escherichia coli</b>                            |                                                                           |                              |
| S17 $\lambda$ pir_pSAM-bt                          | S17 $\lambda$ pir_pSAM-bt                                                 | (7)                          |
| S17 $\lambda$ pir_pExchange-tdk                    | S17 $\lambda$ pir_pExchange-tdk                                           | (5)                          |
| S17 $\lambda$ pir_pExchange-BT3560-3562            | S17 $\lambda$ pir_pExchange-BT3560-3562                                   | This study                   |
| S17 $\lambda$ pir_pExchange-BT3560-3563            | S17 $\lambda$ pir_pExchange-BT3560-3563                                   | This study                   |
| S17 $\lambda$ pir_pExchange-BT3560                 | S17 $\lambda$ pir_pExchange-BT3560                                        | This study                   |
| S17 $\lambda$ pir_pExchange-BT3561                 | S17 $\lambda$ pir_pExchange-BT3561                                        | This study                   |
| S17 $\lambda$ pir_pExchange-BT3562                 | S17 $\lambda$ pir_pExchange-BT3562                                        | This study                   |
| S17 $\lambda$ pir_pExchange-BT3563                 | S17 $\lambda$ pir_pExchange-BT3563                                        | This study                   |
| S17 $\lambda$ pir_pLGB13-jmh61_3563                | S17 $\lambda$ pir_pLGB13-BT3563 from jmh61                                | This study                   |
| S17 $\lambda$ pir_pLGB13-jmh43_3563                | S17 $\lambda$ pir_pLGB13-BT3563 from jmh43                                | This study                   |
| S17 $\lambda$ pir_pNBU2-bla-erm-p1311              | S17 $\lambda$ pir_pNBU2-bla-erm-p1311                                     | This study                   |
| S17 $\lambda$ pir_pNBU2-bla-erm-p1311-BT3560       | S17 $\lambda$ pir_pNBU2-bla-erm-p1311-BT3560                              | This study                   |
| S17 $\lambda$ pir_pNBU2-bla-erm-p1311-BT3562       | S17 $\lambda$ pir_pNBU2-bla-erm-p1311-BT3562                              | This study                   |
| S17 $\lambda$ pir_pNBU2-bla-tet-p1311              | S17 $\lambda$ pir_pNBU2-bla-tet-p1311                                     | This study                   |
| S17 $\lambda$ pir_pNBU2-bla-tet-p1311-BT3563       | S17 $\lambda$ pir_pNBU2-bla-tet-p1311-BT3563                              | This study                   |
| <b>Plasmids</b>                                    |                                                                           |                              |
| <b>Name</b>                                        | <b>Description</b>                                                        | <b>Reference</b>             |

|                            |                                                          |            |
|----------------------------|----------------------------------------------------------|------------|
| pSAM-bt                    | Random transposon mutagenesis                            | (6)        |
| pExchange-tdk              | Site-directed unmarked gene deletion                     | (8)        |
| pLGB13                     | Site-directed unmarked gene deletion in natural isolates | (9)        |
| pExchange-BT3560-3562      | Site-directed unmarked gene deletion                     | This study |
| pExchange-BT3560-3563      | Site-directed unmarked gene deletion                     | This study |
| pExchange-BT3560           | Site-directed unmarked gene deletion                     | This study |
| pExchange-BT3561           | Site-directed unmarked gene deletion                     | This study |
| pExchange-BT3562           | Site-directed unmarked gene deletion                     | This study |
| pExchange-BT3563           | Site-directed unmarked gene deletion                     | This study |
| pLGB13-jmh61_3563          | Site-directed unmarked gene deletion                     | This study |
| pLGB13-jmh43_3563          | Site-directed unmarked gene deletion                     | This study |
| pNBU2-bla-erm-p1311        | Site-directed unmarked gene deletion                     | (10)       |
| pNBU2-bla-erm-p1311-BT3560 | Complementation                                          | This study |
| pNBU2-bla-erm-p1311-BT3562 | Complementation                                          | This study |
| pNBU2-bla-tet-p1311        | Complementation                                          | This study |
| pNBU2-bla-tet-p1311-BT3563 | Complementation                                          | This study |

1  
2

1  
2

**Supporting Table S4: List of primers used in this study**

| Construct             | Name             | Sequence (5'-->3')                                    |                                                         |
|-----------------------|------------------|-------------------------------------------------------|---------------------------------------------------------|
| pExchange             | pEx-ch-F         | TGGGAATCCCCTCCACCGC                                   |                                                         |
|                       | pEx-ch-R         | GGGGAGAGGACGGACAGAAGAT                                |                                                         |
|                       | pExchange R      | CGTCGACTCGAATGTTATCTTC                                |                                                         |
|                       | pExchangeF       | TCTAGAGCGGCCGCCACC                                    |                                                         |
| pExchange-BT3560-3562 | 3560-5Fb         | AGATAACATTCGAGTCGACGGTACTTTCCTTCTTTTTGGAAC            |                                                         |
|                       | 3560-5Rb         | TACTTTAAAATATGCACCCAAATTTAAATTATTATTAGTGTTAATTTGTAGC  |                                                         |
|                       | 3562-3Fb         | CACTAATAATAATTTAAATTTGGGTGCATATTTTAAAGTACCAGG         |                                                         |
|                       | 3562-3R          | GCGGTGGCGGCCGCTCTAGATTGTGGATGAAGATCAGCAATAGAC         |                                                         |
| pExchange-BT3560-3563 | 3560-5Fb         | AGATAACATTCGAGTCGACGGTACTTTCCTTCTTTTTGGAAC            |                                                         |
|                       | 3560-5Rb         | TATAACAAACAAGTTTTATTAATTTAAATTATTATTAGTGTTAATTTGTAGC  |                                                         |
|                       | 3563-3Fb         | CACTAATAATAATTTAAATTAATAAAACTTGTTTGTATAGATATAATTAGACC |                                                         |
|                       | 3563-3R          | GCGGTGGCGGCCGCTCTAGAAACATATATCTTTGCTGTACAC            |                                                         |
|                       | 3560-extF        | CGCTATACCCATTAAGCCATAC                                |                                                         |
|                       | 3563-extR        | GATATTAATGGCAACAACACC                                 |                                                         |
| pExchange-BT3560      | 3560-3F          | GATTAGGAATAGTGATTGCAATAAATGGGCAAATTAATACAAGGAAATG     |                                                         |
|                       | 3560-3R          | GCGGTGGCGGCCGCTCTAGACAAGCTTCTGAGTTATCCTGTTTC          |                                                         |
|                       | 3560-5R          | GTATTAATTTGCCATTTATTGCAATCACTATTCCTAATCTTTGTTTC       |                                                         |
|                       | 3560-5F          | AGATAACATTCGAGTCGACGTTAGCGGATACAGAACAGATGG            |                                                         |
| pExchange-BT3561      | 3561-3F          | TAATACAAGGAAATGATATGCAAAGAAATAACTAATAAAAAATAATTTCAAC  |                                                         |
|                       | 3561-3R          | GCGGTGGCGGCCGCTCTAGAAGAAGAGCTAGTACTTGTATATTTAAATC     |                                                         |
|                       | 3561-5R          | TTTTATTAGTTATTTCTTTGCATATCATTTCTTGTATTAATTTGCC        |                                                         |
|                       | 3561-5F          | AGATAACATTCGAGTCGACGTTATCAGGGTGATAACGATGGAC           |                                                         |
| pExchange-BT3562      | 3562-3F          | TGATGTTCTGCTCCTTATGTGGGTGCATATTTTAAAGTACCAGG          |                                                         |
|                       | 3562-3R          | GCGGTGGCGGCCGCTCTAGATTGTGGATGAAGATCAGCAATAGAC         |                                                         |
|                       | 3562-5R          | GTACTTTAAAATATGCACCCACATAAGGAGCAGGAACATCACTAC         |                                                         |
|                       | 3562-5F          | AGATAACATTCGAGTCGACGTACGAACCTTGCCTACTGGCG             |                                                         |
|                       | pExchange-BT3563 | 3563-3F                                               | CTTTTTTAACAAAAATGAATTAATAAAACTTGTTTGTATAGATATAATTA GACC |
|                       |                  | 3563-3R                                               | GCGGTGGCGGCCGCTCTAGAAACATATATCTTTGCTGTACAC              |
|                       | 3563-5R          | CTATAACAAACAAGTTTTATTAATTCATTTTTGTTAAAAAAGGAG         |                                                         |
|                       | 3563-5F          | GAAGATAACATTCGAGTCGACGGCAGATTTGAGTGCTCAAGC            |                                                         |
|                       | 3563-extF        | GATAATACATGGGTATCATTGAC                               |                                                         |
|                       | 3563-extR        | GATATTAATGGCAACAACACC                                 |                                                         |
| pLGB13                | pLGB13-linR      | TGATATCGAATTCCTGCAGC                                  |                                                         |
|                       | pLGB13-linF      | GCTTATCGATACCGTCGAC                                   |                                                         |
|                       | pLGB13-chF       | GGTGTAAGATTAGCATTATGAGTG                              |                                                         |

|                                    |                   |                                                        |
|------------------------------------|-------------------|--------------------------------------------------------|
|                                    | pLGB13-<br>chR    | CCATCACTGGAAGATAGGC                                    |
| pLGB13-<br>jmh61_3563              | jmh61-3563-<br>5R | AACAAACAAGTTTTATTCTATATTGAAAATTAAGGGGAGTATATTAC        |
|                                    | jmh61-3563-<br>5F | GCTGCAGGAATTCGATATCAACTGAAACTCTTGGTGCG                 |
|                                    | jmh61-3563-<br>3F | ACTCCCCTTAATTTTCAATATAGAATAAACTTGTGGTTATAGATATAA       |
|                                    | jmh61-3563-<br>3R | AGTCGACGGTATCGATAAGCGCGCATCAGCGAGATGTAATAAGC           |
| pLGB13-<br>jmh43_3563              | jmh43-3563-<br>5R | TAAGCTAGCTTATTTAAGATATATATTTAGAGACAAGTAAC              |
|                                    | jmh43-3563-<br>5F | GAAGATAACATTCGAGTCGACGGCAGATTTGAGTGCTCAAGC             |
|                                    | jmh43-3563-<br>3F | CTCTAAATATATATCTTAAATAAGCTAGCTTATGAAAAACTGTTATTAG      |
|                                    | jmh43-3563-<br>3R | GATATTAATGGCAACAACACC                                  |
| pNBU2-bla                          | pNBU-chR          | GCCAATGCACAAATGCTGTTCC                                 |
|                                    | pNBU-chF          | CAGGTGTATCCCATCCGG                                     |
|                                    | pNBU-F            | CGACGTCGACTAATTGCC                                     |
|                                    | pNBU-R            | ATGTTAAAAACAGATTTGGAGTGC                               |
| pNBU2-bla-<br>erm-p1311-<br>BT3560 | NBU-3560-F        | AATCTGTTTTTAACATATGAAACAAAGATTAGGAATAGTGATTGC          |
|                                    | NBU-3560-<br>R    | TAGGCAATTAGTCGACGTCGTTAGAATCTATATCCAATGTTCAAGAAAG<br>C |
| pNBU2-bla-<br>erm-p1311-<br>BT3562 | NBU-3562-F        | AAATCTGTTTTTAACATATGAAAAAGATTCTAAATGCTTTATTCTTG        |
|                                    | NBU-3562-<br>R    | TAGGCAATTAGTCGACGTCGTTATTCACGAACCTTATATTCGGTAGG        |
| pNBU2-bla-tet-<br>p1311-BT3563     | NBU-3563-<br>R    | TAGGCAATTAGTCGACGTCGCTATTGCAGTCCGGTCC                  |
|                                    | NBU-3563-F        | TCCAATCTGTTTTTAACATATGAGATTTTTTAATAGAAGTGTG            |



1 **Supporting Dataset S1** (excel spreadsheet). RNAseq analysis: table of A. all genes,  
2 B. upregulated, C. downregulated genes in presence of 0.5% bile, D. COG functional  
3 categories enrichment.  
4  
5

## Supplementary Information Reference list

1. D. Ryan, L. Jenniches, S. Reichardt, L. Barquist, A. J. Westermann, A high-resolution transcriptome map identifies small RNA regulation of metabolism in the gut microbe *Bacteroides thetaiotaomicron*. *Nature Communications* **11**, 1--16 (2020).
2. R. Buels *et al.*, JBrowse: A dynamic web platform for genome visualization and analysis. *Genome Biology* **17**, 1--12 (2016).
3. D. Vallenet *et al.*, MicroScope: An integrated platform for the annotation and exploration of microbial gene functions through genomic, pangenomic and metabolic comparative analysis. *Nucleic Acids Research* **48**, D579--D589 (2020).
4. J. Oberto, SyntTax: A web server linking synteny to prokaryotic taxonomy. *BMC Bioinformatics* **14** (2013).
5. N. M. Koropatkin, E. C. Martens, J. I. Gordon, T. J. Smith, Starch Catabolism by a Prominent Human Gut Symbiont Is Directed by the Recognition of Amylose Helices. *Structure* **16**, 1105--1115 (2008).
6. J. Mihajlovic *et al.*, A putative type v pilus contributes to bacteroides thetaiotaomicron biofilm formation capacity. **201** (2019).
7. A. L. Goodman *et al.*, Identifying genetic determinants needed to establish a human gut symbiont in its habitat. *Cell host & microbe* **6**, 279--289 (2009).
8. E. C. Martens, H. C. Chiang, J. I. Gordon, Mucosal Glycan Foraging Enhances Fitness and Transmission of a Saccharolytic Human Gut Bacterial Symbiont. *Cell Host and Microbe* **4**, 447--457 (2008).
9. L. Garca-Bayona, L. E. Comstock, Streamlined genetic manipulation of diverse bacteroides and parabacteroides isolates from the human gut microbiota. *mBio* **10** (2019).
10. J. Wang, N. B. Shoemaker, G. R. Wang, A. A. Salyers, Characterization of a *Bacteroides mobilizable* transposon, NBU2, which carries a functional lincomycin resistance gene. *Journal of Bacteriology* **182**, 3559--3571 (2000).
